# Supplementary material for: Reduction of oxygen catalyzed by nickel diphosphine complexes with positioned pendant amines
Source: Royal Society of Chemistry journal article supplement (doi:10.1039/b921245k), 2010-01-01
Supplement: b921245k.pdf [file b921245k.pdf]

*Supplementary Information*

**Reduction of Oxygen Catalyzed by Nickel Diphosphine Complexes with Positioned Pendant Amines**

Jenny Y. Yang,<sup>a</sup> R. Morris Bullock,<sup>a</sup> William G. Dougherty,<sup>a</sup> W. Scott Kassel,<sup>b</sup> Brendan Twamley,<sup>c</sup> Daniel L. DuBois,<sup>a</sup> and M. Rakowski DuBois<sup>a</sup>

<sup>a</sup>*Chemical and Materials Sciences Division, Pacific Northwest National Laboratory, Richland, WA 99352*

<sup>b</sup>*Department of Chemistry, Villanova University, Villanova, Pennsylvania 19085*

<sup>c</sup>*Department of Chemistry, University of Idaho, Moscow, Idaho 83844*

[mary\\_rakowskidubois@pnl.gov](mailto:mary_rakowskidubois@pnl.gov)

| <b>Table of Contents for Supporting Information</b>                                                                                                                                                                                 | <b>Page</b> |
|-------------------------------------------------------------------------------------------------------------------------------------------------------------------------------------------------------------------------------------|-------------|
| <b>Figure S1.</b> VT <sup>31</sup> P{ <sup>1</sup> H} NMR spectra of [Ni(P <sup>Ph</sup> <sub>2</sub> N <sup>Me</sup> <sub>2</sub> ) <sub>2</sub> ](BF <sub>4</sub> ) <sub>2</sub> .                                                | S2          |
| <b>Figure S2.</b> Dependence of catalytic current for O <sub>2</sub> reduction under different concentrations of ( <b>2</b> ).                                                                                                      | S3          |
| <b>Figure S3.</b> Cyclic voltammograms of <b>2</b> under different control conditions for O <sub>2</sub> reduction.                                                                                                                 | S4          |
| <b>Figure S4.</b> Cyclic voltammograms of <b>2</b> under different control conditions for H <sub>2</sub> O <sub>2</sub> reduction.                                                                                                  | S5          |
| <b>Figure S5.</b> <sup>1</sup> H NMR concentration dependent H <sub>2</sub> O resonance in an acid-base buffer solution.                                                                                                            | S6          |
| <b>Table S1.</b> Crystal data and structure refinement for [Ni(P <sup>Ph</sup> <sub>2</sub> <sup>Me</sup> <sub>2</sub> ) <sub>2</sub> ] ( <b>6</b> ).                                                                               | S7          |
| <b>Table S2.</b> Atomic Coordinates and isotropic parameters for [Ni(P <sup>Ph</sup> <sub>2</sub> <sup>Me</sup> <sub>2</sub> ) <sub>2</sub> ] ( <b>6</b> ).                                                                         | S8          |
| <b>Table S3.</b> Bond lengths and angles for [Ni(P <sup>Ph</sup> <sub>2</sub> <sup>Me</sup> <sub>2</sub> ) <sub>2</sub> ] ( <b>6</b> ).                                                                                             | S9          |
| <b>Table S4.</b> Anisotropic displacement parameters for [Ni(P <sup>Ph</sup> <sub>2</sub> <sup>Me</sup> <sub>2</sub> ) <sub>2</sub> ] ( <b>6</b> ).                                                                                 | S12         |
| <b>Table S5.</b> Hydrogen coordinates and isotropic displacement parameters for [Ni(P <sup>Ph</sup> <sub>2</sub> <sup>Me</sup> <sub>2</sub> ) <sub>2</sub> ] ( <b>6</b> ).                                                          | S13         |
| <b>Table S6.</b> Crystal data and structure refinement for [Ni(OP <sup>Ph</sup> <sub>2</sub> N <sup>Bz</sup> <sub>2</sub> ) <sub>2</sub> ](BF <sub>4</sub> ) <sub>2</sub> •(CH <sub>3</sub> CN) ( <b>8</b> ).                       | S14         |
| <b>Table S7.</b> Atomic Coordinates and isotropic parameters for [Ni(OP <sup>Ph</sup> <sub>2</sub> N <sup>Bz</sup> <sub>2</sub> ) <sub>2</sub> ](BF <sub>4</sub> ) <sub>2</sub> •(CH <sub>3</sub> CN) ( <b>8</b> ).                 | S15         |
| <b>Table S8.</b> Bond lengths and angles for [Ni(OP <sup>Ph</sup> <sub>2</sub> N <sup>Bz</sup> <sub>2</sub> ) <sub>2</sub> ](BF <sub>4</sub> ) <sub>2</sub> •(CH <sub>3</sub> CN) ( <b>8</b> ).                                     | S18         |
| <b>Table S9.</b> Anisotropic displacement parameters for [Ni(OP <sup>Ph</sup> <sub>2</sub> N <sup>Bz</sup> <sub>2</sub> ) <sub>2</sub> ](BF <sub>4</sub> ) <sub>2</sub> •(CH <sub>3</sub> CN) ( <b>8</b> ).                         | S25         |
| <b>Table S10.</b> Hydrogen coordinates and isotropic displacement parameters for [Ni(OP <sup>Ph</sup> <sub>2</sub> N <sup>Bz</sup> <sub>2</sub> ) <sub>2</sub> ](BF <sub>4</sub> ) <sub>2</sub> •(CH <sub>3</sub> CN) ( <b>8</b> ). | S28         |

Supplementary Information

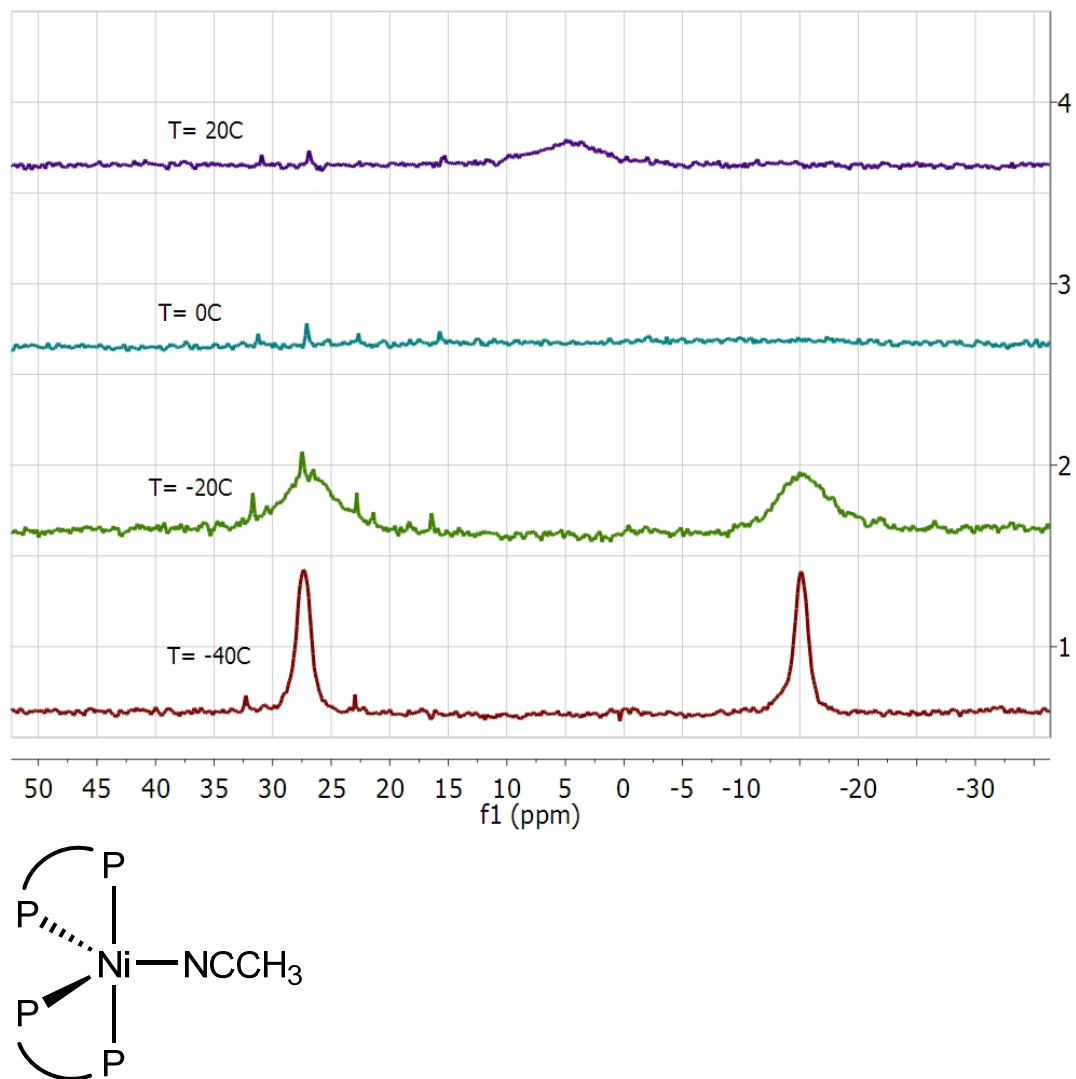

**Figure S1.** Variable temperature  $^{31}\text{P}$  NMR spectra of  $[\text{Ni}(\text{P}^{\text{Ph}}_2\text{N}^{\text{Me}}_2)_2](\text{BF}_4)_2$  in acetonitrile.

Supplementary Information

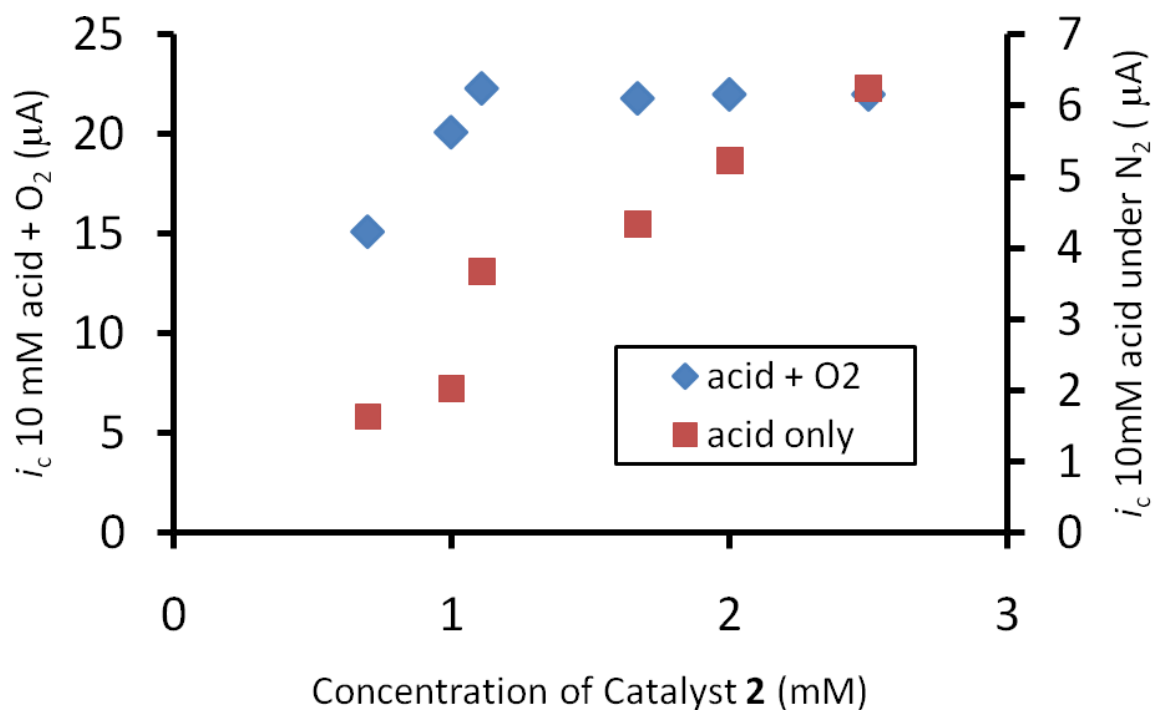

**Figure S2.** Catalyst (**2**) concentration dependent studies. At 10 mM of 4-bromoanilinium tetrafluoroborate, catalytic current observed as a function of catalyst concentration under: oxygen (blue diamonds), corresponding to the current magnitudes on the left axis, and under nitrogen (red squares), corresponding to the current magnitudes on the right axis. The current under nitrogen is associated with proton reduction by catalyst **2**.

Supplementary Information

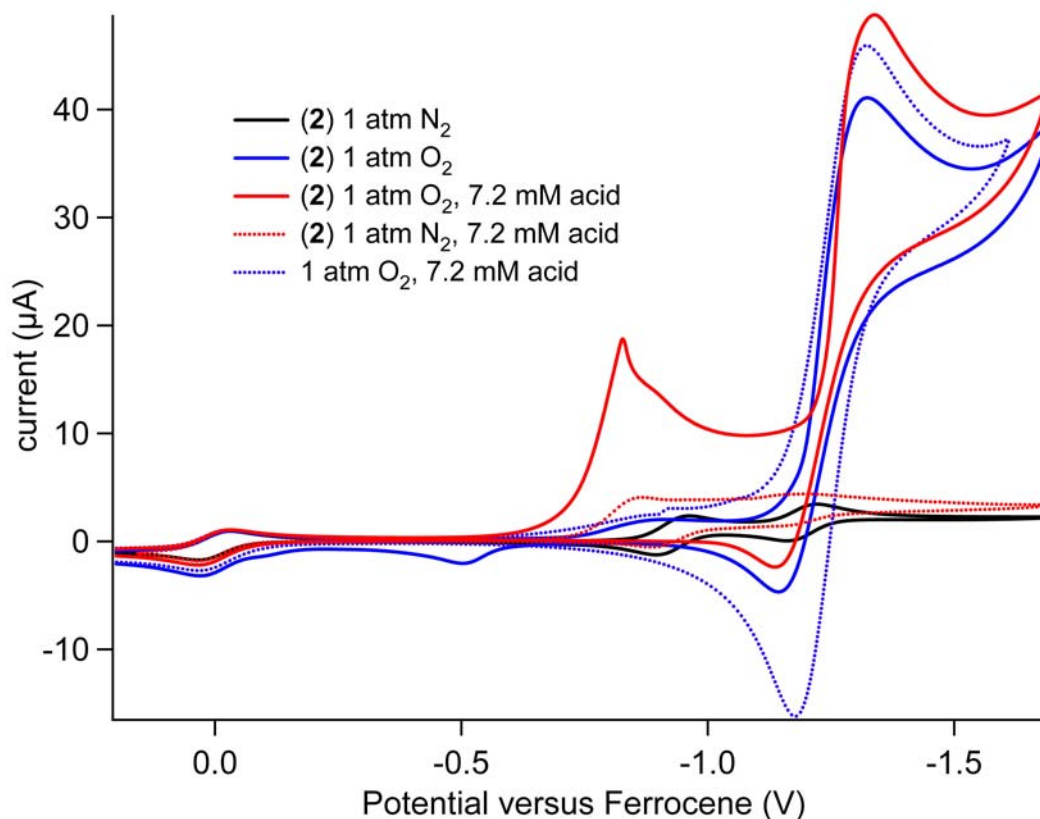

**Figure S3.** Cyclic voltammograms of 1.7 mM solutions of  $\text{Ni}(\text{P}^{\text{Ph}}_2\text{N}^{\text{Bz}}_2)_2(\text{BF}_4)_2$  (**2**) under 1 atmosphere of nitrogen (black), and oxygen (blue). The same catalyst solution with 7.2 mM of 4-bromoanilinium tetrafluoroborate is also shown under oxygen (red), and nitrogen (dotted red). A solution of 7.2 mM of 4-bromoanilinium tetrafluoroborate with no catalyst under oxygen is shown as the dotted blue trace. Conditions: scan rate = 50 mV/s, acetonitrile solvent, 0.2 M  $\text{Et}_4\text{NBF}_4$  as supporting electrolyte, glassy carbon working electrode. Potentials are referenced to the ferrocene/ferrocenium couple (wave shown at 0.0 V).

Supplementary Information

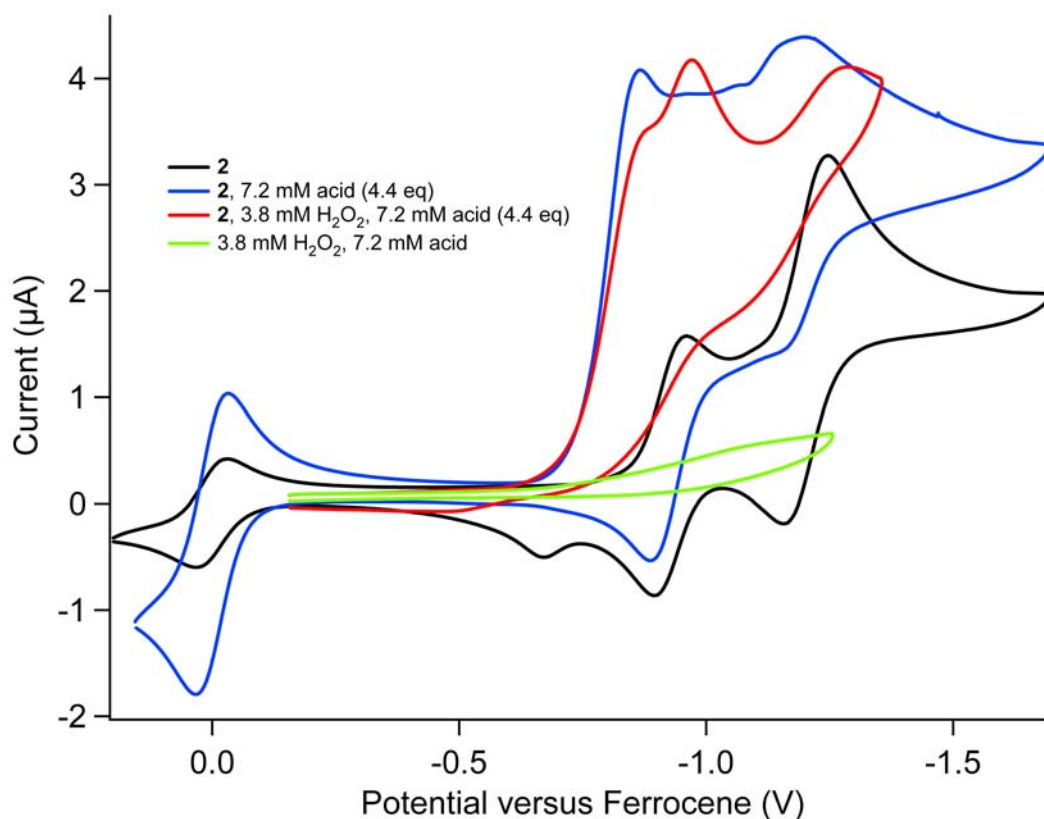

**Figure S4.** Cyclic voltammograms of a 1.7 mM solution of  $\text{Ni}(\text{P}^{\text{Ph}}_2\text{N}^{\text{Bz}}_2)(\text{BF}_4)_2$  (**2**) under nitrogen (black), and in 7.2 mM of 4-bromoanilinium tetrafluoroborate (4.4 equivalents with respect to catalyst) with 1  $\mu\text{L}$  of 30% w/w aqueous  $\text{H}_2\text{O}_2$  solution (red) and without added  $\text{H}_2\text{O}_2$  (blue). The green trace was recorded in a solution with the same concentration of  $\text{H}_2\text{O}_2$  and acid as red, but in the absence of catalyst. Conditions: scan rate = 50 mV/s, acetonitrile solvent, 0.2 M  $\text{Et}_4\text{NBF}_4$  as supporting electrolyte, glassy carbon working electrode. Potentials are referenced to the ferrocene/ferrocenium couple (wave shown at 0.0 V).

Supplementary Information

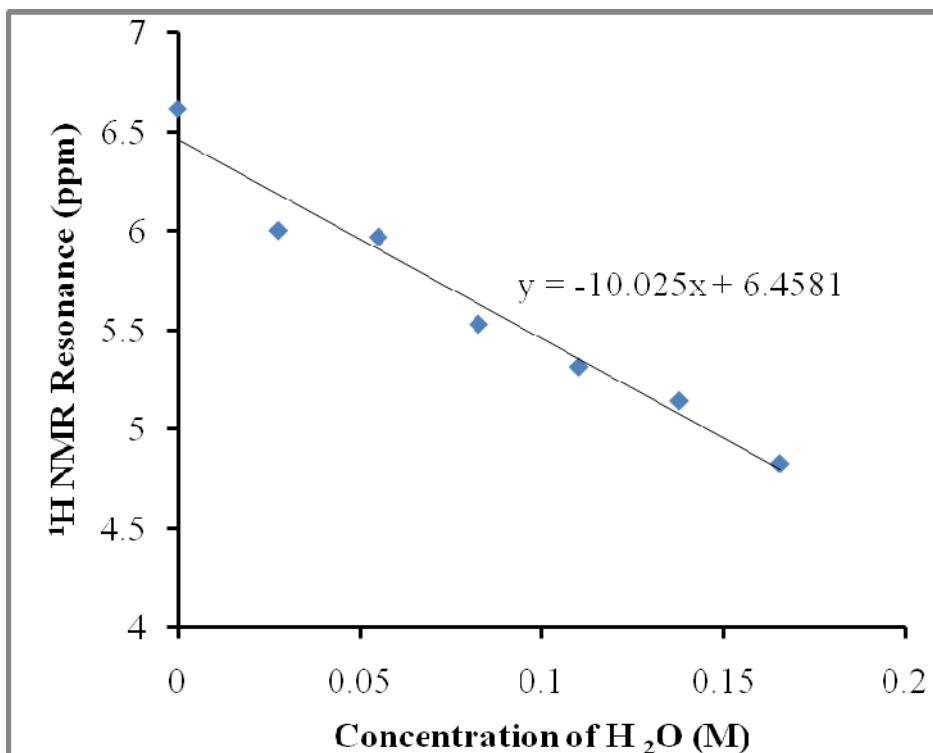

**Figure S5.** The relative concentration of 4-bromoanilinium tetrafluoroborate and the conjugate base were determined by the <sup>1</sup>H NMR spectra of the solution taken after the controlled-potential coulometry experiment. A solution with the same acid-base concentration was prepared and water was titrated into the solution. Because of the fast proton exchange between the acid and the water at room temperature, only one resonance is observed in the <sup>1</sup>H NMR for the N-H protons and from H<sub>2</sub>O. The resonance shift due to the changes in H<sub>2</sub>O concentration was plotted, and the best fit line was used to determine the concentration of water in the post-electrolysis solution.

*Supplementary Information*

**Table S1.** Crystal data and structure refinement for [Ni(P<sup>Ph</sup><sub>2</sub><sup>Me</sup><sub>2</sub>)<sub>2</sub>] (**6**).

|                                   |                                                                                  |                    |
|-----------------------------------|----------------------------------------------------------------------------------|--------------------|
| Identification code               | pnl020                                                                           |                    |
| Empirical formula                 | C <sub>18</sub> H <sub>24</sub> N <sub>2</sub> Ni <sub>0.50</sub> P <sub>2</sub> |                    |
| Formula weight                    | 359.69                                                                           |                    |
| Temperature                       | 100(2) K                                                                         |                    |
| Wavelength                        | 1.54178 Å                                                                        |                    |
| Crystal system                    | Monoclinic                                                                       |                    |
| Space group                       | C2/c                                                                             |                    |
| Unit cell dimensions              | a = 9.7763(2) Å                                                                  | α = 90°.           |
|                                   | b = 19.7795(4) Å                                                                 | β = 101.1210(10)°. |
|                                   | c = 19.0291(3) Å                                                                 | γ = 90°.           |
| Volume                            | 3610.57(12) Å <sup>3</sup>                                                       |                    |
| Z                                 | 8                                                                                |                    |
| Density (calculated)              | 1.323 Mg/m <sup>3</sup>                                                          |                    |
| Absorption coefficient            | 2.685 mm <sup>-1</sup>                                                           |                    |
| F(000)                            | 1520                                                                             |                    |
| Crystal size                      | 0.12 x 0.11 x 0.06 mm <sup>3</sup>                                               |                    |
| Theta range for data collection   | 4.47 to 69.10°.                                                                  |                    |
| Index ranges                      | -11 ≤ h ≤ 11, -22 ≤ k ≤ 12, -22 ≤ l ≤ 22                                         |                    |
| Reflections collected             | 10592                                                                            |                    |
| Independent reflections           | 3181 [R(int) = 0.0201]                                                           |                    |
| Completeness to theta = 67.00°    | 97.0 %                                                                           |                    |
| Absorption correction             | Semi-empirical from equivalents                                                  |                    |
| Max. and min. transmission        | 0.8642 and 0.7370                                                                |                    |
| Refinement method                 | Full-matrix least-squares on F <sup>2</sup>                                      |                    |
| Data / restraints / parameters    | 3181 / 0 / 206                                                                   |                    |
| Goodness-of-fit on F <sup>2</sup> | 1.026                                                                            |                    |
| Final R indices [I > 2σ(I)]       | R1 = 0.0297, wR2 = 0.0787                                                        |                    |
| R indices (all data)              | R1 = 0.0317, wR2 = 0.0804                                                        |                    |
| Largest diff. peak and hole       | 0.487 and -0.235 e.Å <sup>-3</sup>                                               |                    |

*Supplementary Information*

**Table S2.** Atomic coordinates ( $\times 10^4$ ) and equivalent isotropic displacement parameters ( $\text{\AA}^2 \times 10^3$ ) for  $[\text{Ni}(\text{P}^{\text{Ph}}_2\text{Me}_2)_2]$  (**6**).  $U(\text{eq})$  is defined as one third of the trace of the orthogonalized  $U_{ij}$  tensor.

|       | x        | y       | z       | U(eq) |
|-------|----------|---------|---------|-------|
| Ni(1) | 0        | 2917(1) | 2500    | 14(1) |
| N(1)  | 500(2)   | 2278(1) | 730(1)  | 20(1) |
| N(2)  | 2552(1)  | 3596(1) | 1753(1) | 17(1) |
| P(1)  | 1622(1)  | 2349(1) | 2179(1) | 15(1) |
| P(2)  | -320(1)  | 3366(1) | 1466(1) | 14(1) |
| C(1)  | 3742(2)  | 1974(1) | 3318(1) | 22(1) |
| C(2)  | 4649(2)  | 1533(1) | 3747(1) | 26(1) |
| C(3)  | 4610(2)  | 848(1)  | 3598(1) | 30(1) |
| C(4)  | 3663(2)  | 604(1)  | 3019(1) | 33(1) |
| C(5)  | 2762(2)  | 1046(1) | 2586(1) | 27(1) |
| C(6)  | 2798(2)  | 1738(1) | 2723(1) | 18(1) |
| C(7)  | 971(2)   | 1844(1) | 1354(1) | 20(1) |
| C(8)  | 252(2)   | 1866(1) | 81(1)   | 31(1) |
| C(9)  | -717(2)  | 2701(1) | 760(1)  | 19(1) |
| C(10) | 2932(2)  | 2878(1) | 1828(1) | 18(1) |
| C(11) | 3702(2)  | 3987(1) | 1573(1) | 21(1) |
| C(12) | 1283(2)  | 3732(1) | 1218(1) | 16(1) |
| C(13) | -1623(2) | 4287(1) | 393(1)  | 24(1) |
| C(14) | -2542(2) | 4804(1) | 138(1)  | 29(1) |
| C(15) | -3444(2) | 5053(1) | 560(1)  | 30(1) |
| C(16) | -3432(2) | 4779(1) | 1229(1) | 26(1) |
| C(17) | -2500(2) | 4262(1) | 1494(1) | 21(1) |
| C(18) | -1586(2) | 4016(1) | 1077(1) | 18(1) |



*Supplementary Information*

**Table S3.** Bond lengths [Å] and angles [°] for [Ni(P<sup>Ph</sup><sub>2</sub><sup>Me</sup><sub>2</sub>)<sub>2</sub>] (**6**).

---

|                     |             |
|---------------------|-------------|
| Ni(1)-P(2)          | 2.1262(4)   |
| Ni(1)-P(2)#1        | 2.1262(4)   |
| Ni(1)-P(1)          | 2.1266(4)   |
| Ni(1)-P(1)#1        | 2.1266(4)   |
| N(1)-C(8)           | 1.460(2)    |
| N(1)-C(9)           | 1.464(2)    |
| N(1)-C(7)           | 1.467(2)    |
| N(2)-C(11)          | 1.460(2)    |
| N(2)-C(10)          | 1.468(2)    |
| N(2)-C(12)          | 1.4693(19)  |
| P(1)-C(6)           | 1.8428(16)  |
| P(1)-C(7)           | 1.8654(16)  |
| P(1)-C(10)          | 1.8723(16)  |
| P(2)-C(18)          | 1.8375(15)  |
| P(2)-C(9)           | 1.8671(16)  |
| P(2)-C(12)          | 1.8679(15)  |
| C(1)-C(2)           | 1.390(2)    |
| C(1)-C(6)           | 1.397(2)    |
| C(2)-C(3)           | 1.384(3)    |
| C(3)-C(4)           | 1.382(3)    |
| C(4)-C(5)           | 1.391(3)    |
| C(5)-C(6)           | 1.392(2)    |
| C(13)-C(14)         | 1.387(2)    |
| C(13)-C(18)         | 1.402(2)    |
| C(14)-C(15)         | 1.392(3)    |
| C(15)-C(16)         | 1.381(3)    |
| C(16)-C(17)         | 1.398(2)    |
| C(17)-C(18)         | 1.392(2)    |
| <hr/>               |             |
| P(2)-Ni(1)-P(2)#1   | 130.57(3)   |
| P(2)-Ni(1)-P(1)     | 86.532(14)  |
| P(2)#1-Ni(1)-P(1)   | 120.121(14) |
| P(2)-Ni(1)-P(1)#1   | 120.123(14) |
| P(2)#1-Ni(1)-P(1)#1 | 86.532(14)  |

*Supplementary Information*

|                   |            |
|-------------------|------------|
| P(1)-Ni(1)-P(1)#1 | 116.29(3)  |
| C(8)-N(1)-C(9)    | 110.38(13) |
| C(8)-N(1)-C(7)    | 109.49(12) |
| C(9)-N(1)-C(7)    | 115.69(13) |
| C(11)-N(2)-C(10)  | 110.08(12) |
| C(11)-N(2)-C(12)  | 108.98(12) |
| C(10)-N(2)-C(12)  | 114.15(12) |
| C(6)-P(1)-C(7)    | 101.25(7)  |
| C(6)-P(1)-C(10)   | 99.85(7)   |
| C(7)-P(1)-C(10)   | 98.40(7)   |
| C(6)-P(1)-Ni(1)   | 127.13(5)  |
| C(7)-P(1)-Ni(1)   | 111.84(5)  |
| C(10)-P(1)-Ni(1)  | 114.01(5)  |
| C(18)-P(2)-C(9)   | 99.93(7)   |
| C(18)-P(2)-C(12)  | 99.24(7)   |
| C(9)-P(2)-C(12)   | 99.16(7)   |
| C(18)-P(2)-Ni(1)  | 129.24(5)  |
| C(9)-P(2)-Ni(1)   | 110.13(5)  |
| C(12)-P(2)-Ni(1)  | 114.49(5)  |
| C(2)-C(1)-C(6)    | 120.91(16) |
| C(3)-C(2)-C(1)    | 120.33(16) |
| C(2)-C(3)-C(4)    | 119.48(16) |
| C(3)-C(4)-C(5)    | 120.22(17) |
| C(6)-C(5)-C(4)    | 121.13(17) |
| C(5)-C(6)-C(1)    | 117.90(15) |
| C(5)-C(6)-P(1)    | 123.39(13) |
| C(1)-C(6)-P(1)    | 118.67(12) |
| N(1)-C(7)-P(1)    | 111.72(11) |
| N(1)-C(9)-P(2)    | 111.93(10) |
| N(2)-C(10)-P(1)   | 113.38(10) |
| N(2)-C(12)-P(2)   | 113.02(10) |
| C(14)-C(13)-C(18) | 120.42(16) |
| C(13)-C(14)-C(15) | 119.87(17) |
| C(16)-C(15)-C(14) | 120.05(15) |
| C(15)-C(16)-C(17) | 120.49(16) |
| C(18)-C(17)-C(16) | 119.76(16) |

*Supplementary Information*

|                   |            |
|-------------------|------------|
| C(17)-C(18)-C(13) | 119.39(15) |
| C(17)-C(18)-P(2)  | 118.14(12) |
| C(13)-C(18)-P(2)  | 122.42(12) |

---

Symmetry transformations used to generate equivalent atoms:

#1 -x,y,-z+1/2

*Supplementary Information*

**Table S4.** Anisotropic displacement parameters ( $\text{\AA}^2 \times 10^3$ ) for  $[\text{Ni}(\text{P}^{\text{Ph}}_2\text{Me}_2)_2]$  (**6**). The anisotropic displacement factor exponent takes the form:  $-2p^2 [ h^2 a^* 2U^{11} + \dots + 2 h k a^* b^* U^{12} ]$

|       | U11   | U22   | U33   | U23   | U13    | U12   |
|-------|-------|-------|-------|-------|--------|-------|
| Ni(1) | 14(1) | 15(1) | 12(1) | 0     | 3(1)   | 0     |
| N(1)  | 27(1) | 17(1) | 15(1) | -2(1) | 3(1)   | 3(1)  |
| N(2)  | 15(1) | 20(1) | 16(1) | 1(1)  | 3(1)   | -2(1) |
| P(1)  | 15(1) | 15(1) | 13(1) | 0(1)  | 2(1)   | 2(1)  |
| P(2)  | 15(1) | 14(1) | 13(1) | 1(1)  | 2(1)   | 1(1)  |
| C(1)  | 22(1) | 22(1) | 22(1) | 2(1)  | 4(1)   | 1(1)  |
| C(2)  | 20(1) | 33(1) | 24(1) | 7(1)  | 0(1)   | 0(1)  |
| C(3)  | 30(1) | 32(1) | 28(1) | 11(1) | 6(1)   | 12(1) |
| C(4)  | 49(1) | 21(1) | 28(1) | 4(1)  | 6(1)   | 9(1)  |
| C(5)  | 35(1) | 22(1) | 22(1) | 1(1)  | 0(1)   | 3(1)  |
| C(6)  | 17(1) | 21(1) | 18(1) | 3(1)  | 6(1)   | 4(1)  |
| C(7)  | 24(1) | 17(1) | 17(1) | -1(1) | 2(1)   | 2(1)  |
| C(8)  | 50(1) | 22(1) | 17(1) | -3(1) | 0(1)   | 9(1)  |
| C(9)  | 21(1) | 18(1) | 17(1) | -2(1) | -1(1)  | 0(1)  |
| C(10) | 16(1) | 21(1) | 18(1) | 3(1)  | 5(1)   | 1(1)  |
| C(11) | 19(1) | 25(1) | 20(1) | 2(1)  | 4(1)   | -4(1) |
| C(12) | 18(1) | 16(1) | 16(1) | 2(1)  | 4(1)   | 0(1)  |
| C(13) | 26(1) | 23(1) | 20(1) | 2(1)  | 0(1)   | 0(1)  |
| C(14) | 33(1) | 22(1) | 27(1) | 7(1)  | -9(1)  | -2(1) |
| C(15) | 20(1) | 16(1) | 45(1) | 1(1)  | -11(1) | 0(1)  |
| C(16) | 17(1) | 18(1) | 42(1) | -6(1) | 2(1)   | 0(1)  |
| C(17) | 17(1) | 19(1) | 26(1) | -2(1) | 2(1)   | -2(1) |
| C(18) | 16(1) | 16(1) | 20(1) | 1(1)  | -1(1)  | -1(1) |

*Supplementary Information*

**Table S5.** Hydrogen coordinates ( $\times 10^4$ ) and isotropic displacement parameters ( $\text{\AA}^2 \times 10^3$ ) for  $[\text{Ni}(\text{P}^{\text{Ph}}_2\text{Me}_2)_2]$  (**6**).

|        | x     | y    | z    | U(eq) |
|--------|-------|------|------|-------|
| H(1A)  | 3764  | 2442 | 3432 | 26    |
| H(2A)  | 5300  | 1703 | 4144 | 31    |
| H(3A)  | 5230  | 547  | 3891 | 36    |
| H(4A)  | 3626  | 134  | 2916 | 40    |
| H(5A)  | 2112  | 872  | 2191 | 33    |
| H(7A)  | 1725  | 1544 | 1259 | 23    |
| H(7B)  | 187   | 1555 | 1434 | 23    |
| H(8A)  | 1101  | 1615 | 47   | 46    |
| H(8B)  | -4    | 2160 | -339 | 46    |
| H(8C)  | -508  | 1548 | 98   | 46    |
| H(9A)  | -1485 | 2412 | 859  | 23    |
| H(9B)  | -1034 | 2920 | 289  | 23    |
| H(10A) | 3845  | 2836 | 2157 | 22    |
| H(10B) | 3037  | 2700 | 1355 | 22    |
| H(11A) | 4559  | 3887 | 1918 | 32    |
| H(11B) | 3492  | 4470 | 1589 | 32    |
| H(11C) | 3828  | 3866 | 1090 | 32    |
| H(12A) | 1398  | 3542 | 752  | 20    |
| H(12B) | 1164  | 4227 | 1160 | 20    |
| H(13A) | -1015 | 4115 | 102  | 28    |
| H(14A) | -2557 | 4989 | -324 | 35    |
| H(15A) | -4068 | 5410 | 388  | 35    |
| H(16A) | -4062 | 4944 | 1512 | 31    |
| H(17A) | -2491 | 4079 | 1956 | 25    |

*Supplementary Information*

**Table S6.** Crystal data and structure refinement for  $[\text{Ni}(\text{OP}^{\text{Ph}}_2\text{N}^{\text{Bz}}_2)_2](\text{BF}_4)_2 \cdot (\text{CH}_3\text{CN})$  **8**.

|                                      |                                                                                                                                         |
|--------------------------------------|-----------------------------------------------------------------------------------------------------------------------------------------|
| Empirical formula                    | $\text{C}_{62}\text{H}_{67}\text{B}_2\text{F}_8\text{N}_5\text{NiO}_4\text{P}_4$                                                        |
| Formula weight                       | 1302.42                                                                                                                                 |
| Temperature                          | 90(2) K                                                                                                                                 |
| Wavelength                           | 0.71073 Å                                                                                                                               |
| Crystal system                       | Monoclinic                                                                                                                              |
| Space group                          | $\text{P}2_1/\text{n}$                                                                                                                  |
| Unit cell dimensions                 | $a = 24.8972(8)$ Å $\alpha = 90^\circ$ .<br>$b = 11.2331(3)$ Å $\beta = 113.371(1)^\circ$ .<br>$c = 25.3567(8)$ Å $\gamma = 90^\circ$ . |
| Volume                               | $6509.8(3)$ Å <sup>3</sup>                                                                                                              |
| Z                                    | 4                                                                                                                                       |
| Density (calculated)                 | 1.329 Mg/m <sup>3</sup>                                                                                                                 |
| Absorption coefficient               | 0.468 mm <sup>-1</sup>                                                                                                                  |
| F(000)                               | 2704                                                                                                                                    |
| Crystal size                         | 0.30 x 0.28 x 0.17 mm <sup>3</sup>                                                                                                      |
| Crystal color and habit              | pale green fragment                                                                                                                     |
| Diffractometer                       | Bruker/Siemens SMART APEX                                                                                                               |
| Theta range for data collection      | 1.94 to 25.25°.                                                                                                                         |
| Index ranges                         | $-29 \leq h \leq 29$ , $-13 \leq k \leq 13$ , $-30 \leq l \leq 30$                                                                      |
| Reflections collected                | 95676                                                                                                                                   |
| Independent reflections              | 11797 [R(int) = 0.0409]                                                                                                                 |
| Completeness to theta = 25.25°       | 100.0 %                                                                                                                                 |
| Absorption correction                | Semi-empirical from equivalents                                                                                                         |
| Max. and min. transmission           | 0.9247 and 0.8723                                                                                                                       |
| Solution method                      | XS, SHELXTL v. 6.14 (Bruker, 2003)                                                                                                      |
| Refinement method                    | Full-matrix least-squares on F <sup>2</sup>                                                                                             |
| Data / restraints / parameters       | 11797 / 15 / 764                                                                                                                        |
| Goodness-of-fit on F <sup>2</sup>    | 1.075                                                                                                                                   |
| Final R indices [ $I > 2\sigma(I)$ ] | R1 = 0.0503, wR2 = 0.1319                                                                                                               |
| R indices (all data)                 | R1 = 0.0598, wR2 = 0.1383                                                                                                               |
| Largest diff. peak and hole          | 1.509 and -0.758 e.Å <sup>-3</sup>                                                                                                      |

*Supplementary Information*

**Table S7.** Atomic coordinates ( $\times 10^4$ ) and equivalent isotropic displacement parameters ( $\text{\AA}^2 \times 10^3$ ) for  $[\text{Ni}(\text{OP}^{\text{Ph}}_2\text{N}^{\text{Bz}}_2)_2](\text{BF}_4)_2 \cdot (\text{CH}_3\text{CN})$  (**8**).  $U(\text{eq})$  is defined as one third of the trace of the orthogonalized  $U_{ij}$  tensor.

|       | x        | y        | z       | U(eq)  |
|-------|----------|----------|---------|--------|
| Ni(1) | 7694(1)  | 324(1)   | 5057(1) | 22(1)  |
| B(1)  | 8483(2)  | 7250(3)  | 2899(1) | 38(1)  |
| B(2)  | 6312(2)  | 2974(3)  | 6924(2) | 48(1)  |
| F(1)  | 8714(2)  | 6145(2)  | 2960(1) | 123(1) |
| F(2)  | 8054(1)  | 7344(2)  | 3113(1) | 74(1)  |
| F(3)  | 8243(1)  | 7511(2)  | 2324(1) | 60(1)  |
| F(4)  | 8914(1)  | 8076(2)  | 3184(1) | 57(1)  |
| F(5)  | 6754(1)  | 3145(3)  | 6730(1) | 121(1) |
| F(6)  | 5833(2)  | 3746(3)  | 6656(1) | 123(1) |
| F(7)  | 6517(1)  | 3161(3)  | 7497(1) | 88(1)  |
| F(8)  | 6093(1)  | 1876(2)  | 6770(1) | 51(1)  |
| N(1)  | 7572(1)  | 1856(2)  | 4498(1) | 24(1)  |
| N(2)  | 7849(1)  | 367(2)   | 3371(1) | 22(1)  |
| N(3)  | 7793(1)  | -1243(2) | 5594(1) | 23(1)  |
| N(4)  | 7353(1)  | 53(2)    | 6639(1) | 22(1)  |
| N(5)  | 9229(2)  | 4041(4)  | 5369(2) | 93(1)  |
| O(1)  | 8490(1)  | 28(2)    | 5024(1) | 24(1)  |
| O(2)  | 7337(1)  | -704(2)  | 4332(1) | 24(1)  |
| O(3)  | 8022(1)  | 1309(2)  | 5799(1) | 26(1)  |
| O(4)  | 6878(1)  | 635(2)   | 5045(1) | 26(1)  |
| P(1)  | 8556(1)  | 686(1)   | 4533(1) | 22(1)  |
| P(2)  | 7007(1)  | -9(1)    | 3791(1) | 23(1)  |
| P(3)  | 8267(1)  | 605(1)   | 6349(1) | 23(1)  |
| P(4)  | 6744(1)  | -162(1)  | 5458(1) | 22(1)  |
| C(1)  | 9502(1)  | 1711(2)  | 4360(1) | 32(1)  |
| C(2)  | 10068(1) | 2121(3)  | 4553(1) | 39(1)  |
| C(3)  | 10437(1) | 2039(3)  | 5128(1) | 39(1)  |
| C(4)  | 10234(1) | 1543(3)  | 5516(1) | 37(1)  |
| C(5)  | 9668(1)  | 1113(2)  | 5326(1) | 31(1)  |

*Supplementary Information*

|       |          |          |         |       |
|-------|----------|----------|---------|-------|
| C(6)  | 9298(1)  | 1190(2)  | 4746(1) | 26(1) |
| C(7)  | 8117(1)  | 2039(2)  | 4399(1) | 24(1) |
| C(8)  | 7446(1)  | 2971(2)  | 4766(1) | 27(1) |
| C(9)  | 6780(1)  | 4357(3)  | 3999(1) | 40(1) |
| C(10) | 6684(2)  | 5328(3)  | 3631(1) | 49(1) |
| C(11) | 7147(2)  | 6022(3)  | 3654(1) | 45(1) |
| C(12) | 7702(2)  | 5763(3)  | 4044(1) | 44(1) |
| C(13) | 7798(1)  | 4801(2)  | 4415(1) | 35(1) |
| C(14) | 7340(1)  | 4068(2)  | 4390(1) | 29(1) |
| C(15) | 7051(1)  | 1579(2)  | 3960(1) | 24(1) |
| C(16) | 6071(1)  | -1500(2) | 3591(1) | 32(1) |
| C(17) | 5484(1)  | -1817(3) | 3343(1) | 40(1) |
| C(18) | 5076(1)  | -1032(3) | 2980(1) | 39(1) |
| C(19) | 5249(1)  | 61(3)    | 2859(1) | 38(1) |
| C(20) | 5832(1)  | 388(3)   | 3095(1) | 34(1) |
| C(21) | 6247(1)  | -400(2)  | 3465(1) | 28(1) |
| C(22) | 7291(1)  | -239(2)  | 3245(1) | 24(1) |
| C(23) | 7961(1)  | 434(2)   | 2838(1) | 26(1) |
| C(24) | 8350(2)  | 2510(3)  | 2960(1) | 45(1) |
| C(25) | 8785(2)  | 3334(3)  | 3009(1) | 62(1) |
| C(26) | 9304(2)  | 2953(4)  | 2994(1) | 72(1) |
| C(27) | 9393(2)  | 1774(4)  | 2929(2) | 68(1) |
| C(28) | 8965(1)  | 941(3)   | 2881(1) | 47(1) |
| C(29) | 8437(1)  | 1315(3)  | 2896(1) | 32(1) |
| C(30) | 8341(1)  | -158(2)  | 3857(1) | 23(1) |
| C(31) | 9284(1)  | 1879(2)  | 6586(1) | 33(1) |
| C(32) | 9865(1)  | 2150(3)  | 6904(1) | 40(1) |
| C(33) | 10179(1) | 1540(3)  | 7404(1) | 38(1) |
| C(34) | 9918(1)  | 651(3)   | 7594(1) | 37(1) |
| C(35) | 9333(1)  | 362(3)   | 7279(1) | 32(1) |
| C(36) | 9015(1)  | 978(2)   | 6774(1) | 26(1) |
| C(37) | 8248(1)  | -971(2)  | 6173(1) | 23(1) |
| C(38) | 7987(1)  | -2321(2) | 5355(1) | 27(1) |
| C(39) | 8661(2)  | -3687(3) | 6113(2) | 61(1) |
| C(40) | 8767(3)  | -4676(4) | 6477(2) | 91(2) |
| C(41) | 8318(3)  | -5396(4) | 6455(2) | 83(2) |



*Supplementary Information*

|       |          |          |         |       |
|-------|----------|----------|---------|-------|
| C(42) | 7759(2)  | -5161(3) | 6065(2) | 70(1) |
| C(43) | 7652(2)  | -4188(3) | 5702(2) | 47(1) |
| C(44) | 8102(1)  | -3417(2) | 5731(1) | 32(1) |
| C(45) | 7205(1)  | -1492(2) | 5595(1) | 23(1) |
| C(46) | 5824(1)  | -1600(3) | 5418(1) | 35(1) |
| C(47) | 5264(1)  | -2045(3) | 5162(1) | 43(1) |
| C(48) | 4885(1)  | -1610(3) | 4634(1) | 42(1) |
| C(49) | 5063(1)  | -722(3)  | 4365(1) | 39(1) |
| C(50) | 5625(1)  | -269(3)  | 4614(1) | 32(1) |
| C(51) | 6010(1)  | -710(2)  | 5145(1) | 26(1) |
| C(52) | 6855(1)  | 538(2)   | 6147(1) | 24(1) |
| C(53) | 7194(1)  | -257(2)  | 7130(1) | 27(1) |
| C(54) | 6975(1)  | -2425(2) | 6887(1) | 32(1) |
| C(55) | 6595(1)  | -3388(3) | 6735(1) | 37(1) |
| C(56) | 6025(1)  | -3259(3) | 6692(1) | 42(1) |
| C(57) | 5834(1)  | -2165(3) | 6802(1) | 42(1) |
| C(58) | 6212(1)  | -1189(3) | 6944(1) | 35(1) |
| C(59) | 6782(1)  | -1307(2) | 6983(1) | 29(1) |
| C(60) | 7878(1)  | 781(2)   | 6817(1) | 26(1) |
| C(61) | 10320(2) | 4685(4)  | 5841(2) | 83(2) |
| C(62) | 9707(2)  | 4337(3)  | 5582(2) | 67(1) |

---

*Supplementary Information*

**Table S8.** Bond lengths [Å] and angles [°] for [Ni(OP<sup>Ph</sup><sub>2</sub>N<sup>Bz</sup><sub>2</sub>)<sub>2</sub>](BF<sub>4</sub>)<sub>2</sub>•(CH<sub>3</sub>CN) (**8**).

---

|            |            |
|------------|------------|
| Ni(1)-O(1) | 2.0423(17) |
| Ni(1)-O(4) | 2.0504(17) |
| Ni(1)-O(2) | 2.0512(17) |
| Ni(1)-O(3) | 2.0523(17) |
| Ni(1)-N(1) | 2.172(2)   |
| Ni(1)-N(3) | 2.180(2)   |
| B(1)-F(1)  | 1.351(4)   |
| B(1)-F(3)  | 1.370(4)   |
| B(1)-F(2)  | 1.380(4)   |
| B(1)-F(4)  | 1.385(4)   |
| B(2)-F(8)  | 1.341(4)   |
| B(2)-F(7)  | 1.352(4)   |
| B(2)-F(5)  | 1.385(4)   |
| B(2)-F(6)  | 1.411(5)   |
| N(1)-C(7)  | 1.491(3)   |
| N(1)-C(15) | 1.493(3)   |
| N(1)-C(8)  | 1.517(3)   |
| N(2)-C(22) | 1.464(3)   |
| N(2)-C(30) | 1.472(3)   |
| N(2)-C(23) | 1.488(3)   |
| N(3)-C(37) | 1.488(3)   |
| N(3)-C(45) | 1.490(3)   |
| N(3)-C(38) | 1.516(3)   |
| N(4)-C(60) | 1.454(3)   |
| N(4)-C(52) | 1.471(3)   |
| N(4)-C(53) | 1.491(3)   |
| N(5)-C(62) | 1.144(5)   |
| O(1)-P(1)  | 1.5136(18) |
| O(2)-P(2)  | 1.5062(18) |
| O(3)-P(3)  | 1.5056(18) |
| O(4)-P(4)  | 1.5111(18) |
| P(1)-C(6)  | 1.798(3)   |
| P(1)-C(7)  | 1.823(2)   |
| P(1)-C(30) | 1.841(2)   |

*Supplementary Information*

|             |          |
|-------------|----------|
| P(2)-C(21)  | 1.795(3) |
| P(2)-C(22)  | 1.804(2) |
| P(2)-C(15)  | 1.827(3) |
| P(3)-C(36)  | 1.792(3) |
| P(3)-C(60)  | 1.817(2) |
| P(3)-C(37)  | 1.821(3) |
| P(4)-C(51)  | 1.788(3) |
| P(4)-C(45)  | 1.831(2) |
| P(4)-C(52)  | 1.833(2) |
| C(1)-C(2)   | 1.376(4) |
| C(1)-C(6)   | 1.397(4) |
| C(2)-C(3)   | 1.384(4) |
| C(3)-C(4)   | 1.386(4) |
| C(4)-C(5)   | 1.384(4) |
| C(5)-C(6)   | 1.394(4) |
| C(8)-C(14)  | 1.516(4) |
| C(9)-C(14)  | 1.393(4) |
| C(9)-C(10)  | 1.393(4) |
| C(10)-C(11) | 1.372(5) |
| C(11)-C(12) | 1.375(5) |
| C(12)-C(13) | 1.390(4) |
| C(13)-C(14) | 1.387(4) |
| C(16)-C(21) | 1.390(4) |
| C(16)-C(17) | 1.390(4) |
| C(17)-C(18) | 1.384(4) |
| C(18)-C(19) | 1.375(5) |
| C(19)-C(20) | 1.384(4) |
| C(20)-C(21) | 1.400(4) |
| C(23)-C(29) | 1.504(4) |
| C(24)-C(29) | 1.380(4) |
| C(24)-C(25) | 1.392(5) |
| C(25)-C(26) | 1.374(6) |
| C(26)-C(27) | 1.364(6) |
| C(27)-C(28) | 1.387(5) |
| C(28)-C(29) | 1.395(4) |
| C(31)-C(32) | 1.383(4) |

*Supplementary Information*

|             |          |
|-------------|----------|
| C(31)-C(36) | 1.396(4) |
| C(32)-C(33) | 1.380(4) |
| C(33)-C(34) | 1.378(4) |
| C(34)-C(35) | 1.395(4) |
| C(35)-C(36) | 1.393(4) |
| C(38)-C(44) | 1.514(4) |
| C(39)-C(44) | 1.378(4) |
| C(39)-C(40) | 1.400(6) |
| C(40)-C(41) | 1.364(7) |
| C(41)-C(42) | 1.376(7) |
| C(42)-C(43) | 1.386(5) |
| C(43)-C(44) | 1.394(4) |
| C(46)-C(47) | 1.378(4) |
| C(46)-C(51) | 1.397(4) |
| C(47)-C(48) | 1.386(4) |
| C(48)-C(49) | 1.377(5) |
| C(49)-C(50) | 1.383(4) |
| C(50)-C(51) | 1.396(4) |
| C(53)-C(59) | 1.509(4) |
| C(54)-C(55) | 1.387(4) |
| C(54)-C(59) | 1.400(4) |
| C(55)-C(56) | 1.387(4) |
| C(56)-C(57) | 1.386(5) |
| C(57)-C(58) | 1.397(4) |
| C(58)-C(59) | 1.389(4) |
| C(61)-C(62) | 1.455(6) |

|                 |           |
|-----------------|-----------|
| O(1)-Ni(1)-O(4) | 177.12(7) |
| O(1)-Ni(1)-O(2) | 87.42(7)  |
| O(4)-Ni(1)-O(2) | 90.48(7)  |
| O(1)-Ni(1)-O(3) | 94.88(7)  |
| O(4)-Ni(1)-O(3) | 87.30(7)  |
| O(2)-Ni(1)-O(3) | 176.93(7) |
| O(1)-Ni(1)-N(1) | 89.45(7)  |
| O(4)-Ni(1)-N(1) | 88.51(7)  |
| O(2)-Ni(1)-N(1) | 87.85(7)  |

*Supplementary Information*

|                  |            |
|------------------|------------|
| O(3)-Ni(1)-N(1)  | 94.20(7)   |
| O(1)-Ni(1)-N(3)  | 91.32(7)   |
| O(4)-Ni(1)-N(3)  | 90.66(7)   |
| O(2)-Ni(1)-N(3)  | 90.39(7)   |
| O(3)-Ni(1)-N(3)  | 87.52(7)   |
| N(1)-Ni(1)-N(3)  | 178.05(8)  |
| F(1)-B(1)-F(3)   | 107.6(3)   |
| F(1)-B(1)-F(2)   | 112.7(3)   |
| F(3)-B(1)-F(2)   | 108.9(3)   |
| F(1)-B(1)-F(4)   | 110.5(3)   |
| F(3)-B(1)-F(4)   | 109.4(3)   |
| F(2)-B(1)-F(4)   | 107.7(2)   |
| F(8)-B(2)-F(7)   | 113.0(3)   |
| F(8)-B(2)-F(5)   | 108.3(3)   |
| F(7)-B(2)-F(5)   | 110.1(3)   |
| F(8)-B(2)-F(6)   | 104.9(3)   |
| F(7)-B(2)-F(6)   | 108.0(3)   |
| F(5)-B(2)-F(6)   | 112.5(4)   |
| C(7)-N(1)-C(15)  | 113.17(18) |
| C(7)-N(1)-C(8)   | 108.99(19) |
| C(15)-N(1)-C(8)  | 108.86(19) |
| C(7)-N(1)-Ni(1)  | 108.51(14) |
| C(15)-N(1)-Ni(1) | 106.07(15) |
| C(8)-N(1)-Ni(1)  | 111.23(14) |
| C(22)-N(2)-C(30) | 113.53(19) |
| C(22)-N(2)-C(23) | 109.25(19) |
| C(30)-N(2)-C(23) | 112.80(19) |
| C(37)-N(3)-C(45) | 113.69(18) |
| C(37)-N(3)-C(38) | 108.61(18) |
| C(45)-N(3)-C(38) | 108.65(19) |
| C(37)-N(3)-Ni(1) | 107.65(15) |
| C(45)-N(3)-Ni(1) | 106.58(14) |
| C(38)-N(3)-Ni(1) | 111.70(14) |
| C(60)-N(4)-C(52) | 114.0(2)   |
| C(60)-N(4)-C(53) | 112.10(19) |
| C(52)-N(4)-C(53) | 112.45(19) |

*Supplementary Information*

|                  |            |
|------------------|------------|
| P(1)-O(1)-Ni(1)  | 112.19(10) |
| P(2)-O(2)-Ni(1)  | 114.17(10) |
| P(3)-O(3)-Ni(1)  | 115.73(10) |
| P(4)-O(4)-Ni(1)  | 112.22(9)  |
| O(1)-P(1)-C(6)   | 109.88(11) |
| O(1)-P(1)-C(7)   | 107.92(10) |
| C(6)-P(1)-C(7)   | 105.17(12) |
| O(1)-P(1)-C(30)  | 115.34(11) |
| C(6)-P(1)-C(30)  | 109.11(12) |
| C(7)-P(1)-C(30)  | 108.92(11) |
| O(2)-P(2)-C(21)  | 112.73(12) |
| O(2)-P(2)-C(22)  | 112.73(11) |
| C(21)-P(2)-C(22) | 105.84(12) |
| O(2)-P(2)-C(15)  | 109.39(11) |
| C(21)-P(2)-C(15) | 107.54(12) |
| C(22)-P(2)-C(15) | 108.36(12) |
| O(3)-P(3)-C(36)  | 112.19(11) |
| O(3)-P(3)-C(60)  | 115.02(11) |
| C(36)-P(3)-C(60) | 106.07(12) |
| O(3)-P(3)-C(37)  | 108.79(10) |
| C(36)-P(3)-C(37) | 107.11(12) |
| C(60)-P(3)-C(37) | 107.26(12) |
| O(4)-P(4)-C(51)  | 111.29(11) |
| O(4)-P(4)-C(45)  | 108.78(11) |
| C(51)-P(4)-C(45) | 104.86(12) |
| O(4)-P(4)-C(52)  | 114.45(11) |
| C(51)-P(4)-C(52) | 108.19(12) |
| C(45)-P(4)-C(52) | 108.81(11) |
| C(2)-C(1)-C(6)   | 119.8(3)   |
| C(1)-C(2)-C(3)   | 120.6(3)   |
| C(2)-C(3)-C(4)   | 119.9(3)   |
| C(5)-C(4)-C(3)   | 120.0(3)   |
| C(4)-C(5)-C(6)   | 120.1(3)   |
| C(5)-C(6)-C(1)   | 119.5(2)   |
| C(5)-C(6)-P(1)   | 118.0(2)   |
| C(1)-C(6)-P(1)   | 122.4(2)   |

*Supplementary Information*

|                   |            |
|-------------------|------------|
| N(1)-C(7)-P(1)    | 111.87(16) |
| C(14)-C(8)-N(1)   | 113.84(19) |
| C(14)-C(9)-C(10)  | 121.0(3)   |
| C(11)-C(10)-C(9)  | 119.9(3)   |
| C(10)-C(11)-C(12) | 119.9(3)   |
| C(11)-C(12)-C(13) | 120.3(3)   |
| C(14)-C(13)-C(12) | 120.9(3)   |
| C(13)-C(14)-C(9)  | 117.9(3)   |
| C(13)-C(14)-C(8)  | 121.3(2)   |
| C(9)-C(14)-C(8)   | 120.8(3)   |
| N(1)-C(15)-P(2)   | 111.53(16) |
| C(21)-C(16)-C(17) | 119.6(3)   |
| C(18)-C(17)-C(16) | 120.0(3)   |
| C(19)-C(18)-C(17) | 120.3(3)   |
| C(18)-C(19)-C(20) | 120.6(3)   |
| C(19)-C(20)-C(21) | 119.3(3)   |
| C(16)-C(21)-C(20) | 120.1(3)   |
| C(16)-C(21)-P(2)  | 118.9(2)   |
| C(20)-C(21)-P(2)  | 121.1(2)   |
| N(2)-C(22)-P(2)   | 113.08(17) |
| N(2)-C(23)-C(29)  | 111.6(2)   |
| C(29)-C(24)-C(25) | 120.3(4)   |
| C(26)-C(25)-C(24) | 119.8(4)   |
| C(27)-C(26)-C(25) | 120.4(3)   |
| C(26)-C(27)-C(28) | 120.6(4)   |
| C(27)-C(28)-C(29) | 119.6(4)   |
| C(24)-C(29)-C(28) | 119.3(3)   |
| C(24)-C(29)-C(23) | 119.9(3)   |
| C(28)-C(29)-C(23) | 120.9(3)   |
| N(2)-C(30)-P(1)   | 114.27(17) |
| C(32)-C(31)-C(36) | 119.6(3)   |
| C(33)-C(32)-C(31) | 120.4(3)   |
| C(34)-C(33)-C(32) | 120.6(3)   |
| C(33)-C(34)-C(35) | 119.9(3)   |
| C(36)-C(35)-C(34) | 119.6(3)   |
| C(35)-C(36)-C(31) | 120.0(2)   |

*Supplementary Information*

|                   |            |
|-------------------|------------|
| C(35)-C(36)-P(3)  | 120.8(2)   |
| C(31)-C(36)-P(3)  | 119.2(2)   |
| N(3)-C(37)-P(3)   | 112.13(16) |
| C(44)-C(38)-N(3)  | 114.11(19) |
| C(44)-C(39)-C(40) | 120.8(4)   |
| C(41)-C(40)-C(39) | 120.4(4)   |
| C(40)-C(41)-C(42) | 119.7(4)   |
| C(41)-C(42)-C(43) | 120.1(4)   |
| C(42)-C(43)-C(44) | 121.0(4)   |
| C(39)-C(44)-C(43) | 117.9(3)   |
| C(39)-C(44)-C(38) | 120.5(3)   |
| C(43)-C(44)-C(38) | 121.6(3)   |
| N(3)-C(45)-P(4)   | 112.85(17) |
| C(47)-C(46)-C(51) | 119.9(3)   |
| C(46)-C(47)-C(48) | 120.1(3)   |
| C(49)-C(48)-C(47) | 120.3(3)   |
| C(48)-C(49)-C(50) | 120.3(3)   |
| C(49)-C(50)-C(51) | 119.6(3)   |
| C(50)-C(51)-C(46) | 119.7(2)   |
| C(50)-C(51)-P(4)  | 119.8(2)   |
| C(46)-C(51)-P(4)  | 120.5(2)   |
| N(4)-C(52)-P(4)   | 114.04(16) |
| N(4)-C(53)-C(59)  | 110.8(2)   |
| C(55)-C(54)-C(59) | 120.3(3)   |
| C(56)-C(55)-C(54) | 120.3(3)   |
| C(57)-C(56)-C(55) | 120.0(3)   |
| C(56)-C(57)-C(58) | 119.9(3)   |
| C(59)-C(58)-C(57) | 120.6(3)   |
| C(58)-C(59)-C(54) | 119.0(3)   |
| C(58)-C(59)-C(53) | 121.2(3)   |
| C(54)-C(59)-C(53) | 119.8(2)   |
| N(4)-C(60)-P(3)   | 112.50(17) |
| N(5)-C(62)-C(61)  | 178.1(5)   |

---

Symmetry transformations used to generate equivalent atoms:



*Supplementary Information*

**Table S9.** Anisotropic displacement parameters ( $\text{\AA}^2 \times 10^3$ ) for  $\text{Ni}(\text{OP}^{\text{Ph}}_2\text{N}^{\text{Bz}}_2)_2(\text{BF}_4)_2 \cdot (\text{CH}_3\text{CN})$  (**8**). The anisotropic displacement factor exponent takes the form:  $-2p^2 [ h^2 a^* 2U^{11} + \dots + 2 h k a^* b^* U^{12} ]$

|       | U11    | U22    | U33    | U23     | U13    | U12    |
|-------|--------|--------|--------|---------|--------|--------|
| Ni(1) | 28(1)  | 24(1)  | 16(1)  | 2(1)    | 10(1)  | 4(1)   |
| B(1)  | 44(2)  | 36(2)  | 29(2)  | -7(1)   | 9(2)   | 0(2)   |
| B(2)  | 57(2)  | 39(2)  | 54(2)  | -20(2)  | 29(2)  | -10(2) |
| F(1)  | 192(3) | 59(2)  | 60(2)  | -13(1)  | -14(2) | 65(2)  |
| F(2)  | 85(2)  | 86(2)  | 74(2)  | -27(1)  | 54(1)  | -46(1) |
| F(3)  | 75(1)  | 67(1)  | 26(1)  | -12(1)  | 9(1)   | -2(1)  |
| F(4)  | 34(1)  | 84(2)  | 50(1)  | -31(1)  | 13(1)  | -12(1) |
| F(5)  | 142(2) | 133(3) | 144(3) | -100(2) | 115(2) | -99(2) |
| F(6)  | 199(4) | 70(2)  | 110(2) | 17(2)   | 71(2)  | 69(2)  |
| F(7)  | 51(1)  | 149(3) | 62(1)  | -62(2)  | 20(1)  | -12(1) |
| F(8)  | 58(1)  | 45(1)  | 61(1)  | -22(1)  | 34(1)  | -20(1) |
| N(1)  | 30(1)  | 25(1)  | 17(1)  | -2(1)   | 10(1)  | 3(1)   |
| N(2)  | 25(1)  | 27(1)  | 15(1)  | 0(1)    | 8(1)   | 1(1)   |
| N(3)  | 26(1)  | 25(1)  | 18(1)  | -2(1)   | 9(1)   | 5(1)   |
| N(4)  | 23(1)  | 31(1)  | 15(1)  | 1(1)    | 8(1)   | 2(1)   |
| N(5)  | 74(3)  | 83(3)  | 94(3)  | -27(2)  | 4(2)   | 23(2)  |
| O(1)  | 27(1)  | 28(1)  | 18(1)  | 2(1)    | 9(1)   | 4(1)   |
| O(2)  | 29(1)  | 26(1)  | 19(1)  | 1(1)    | 10(1)  | 3(1)   |
| O(3)  | 34(1)  | 25(1)  | 20(1)  | 0(1)    | 12(1)  | 2(1)   |
| O(4)  | 30(1)  | 28(1)  | 20(1)  | 6(1)    | 11(1)  | 6(1)   |
| P(1)  | 25(1)  | 24(1)  | 17(1)  | 0(1)    | 8(1)   | 2(1)   |
| P(2)  | 25(1)  | 26(1)  | 18(1)  | 0(1)    | 9(1)   | 2(1)   |
| P(3)  | 26(1)  | 26(1)  | 18(1)  | 0(1)    | 10(1)  | 2(1)   |
| P(4)  | 24(1)  | 25(1)  | 17(1)  | 2(1)    | 8(1)   | 4(1)   |
| C(1)  | 31(1)  | 34(2)  | 29(1)  | 4(1)    | 8(1)   | 0(1)   |
| C(2)  | 37(2)  | 36(2)  | 45(2)  | 7(1)    | 17(1)  | -4(1)  |
| C(3)  | 28(1)  | 34(2)  | 49(2)  | -5(1)   | 8(1)   | -1(1)  |
| C(4)  | 32(2)  | 38(2)  | 31(2)  | -5(1)   | 2(1)   | 6(1)   |
| C(5)  | 33(1)  | 32(2)  | 24(1)  | -3(1)   | 9(1)   | 4(1)   |
| C(6)  | 29(1)  | 21(1)  | 26(1)  | -2(1)   | 9(1)   | 2(1)   |

*Supplementary Information*

|       |        |        |       |        |        |        |
|-------|--------|--------|-------|--------|--------|--------|
| C(7)  | 29(1)  | 24(1)  | 20(1) | -1(1)  | 10(1)  | 1(1)   |
| C(8)  | 36(1)  | 26(1)  | 21(1) | -1(1)  | 13(1)  | 6(1)   |
| C(9)  | 45(2)  | 30(2)  | 38(2) | 1(1)   | 10(1)  | 4(1)   |
| C(10) | 60(2)  | 34(2)  | 38(2) | 5(1)   | 6(2)   | 10(2)  |
| C(11) | 73(2)  | 29(2)  | 30(2) | 4(1)   | 17(2)  | 5(2)   |
| C(12) | 66(2)  | 30(2)  | 46(2) | -2(1)  | 31(2)  | -1(2)  |
| C(13) | 42(2)  | 29(2)  | 34(2) | 0(1)   | 16(1)  | 4(1)   |
| C(14) | 42(2)  | 23(1)  | 24(1) | -1(1)  | 15(1)  | 6(1)   |
| C(15) | 25(1)  | 28(1)  | 20(1) | 1(1)   | 9(1)   | 3(1)   |
| C(16) | 34(2)  | 32(2)  | 29(1) | -4(1)  | 13(1)  | 0(1)   |
| C(17) | 43(2)  | 42(2)  | 43(2) | -12(1) | 24(2)  | -10(1) |
| C(18) | 28(1)  | 55(2)  | 37(2) | -16(1) | 14(1)  | -8(1)  |
| C(19) | 27(2)  | 49(2)  | 32(2) | -7(1)  | 6(1)   | 7(1)   |
| C(20) | 31(2)  | 36(2)  | 32(2) | -2(1)  | 8(1)   | 4(1)   |
| C(21) | 27(1)  | 33(1)  | 23(1) | -4(1)  | 11(1)  | 2(1)   |
| C(22) | 27(1)  | 29(1)  | 17(1) | -1(1)  | 8(1)   | 0(1)   |
| C(23) | 32(1)  | 30(1)  | 17(1) | 1(1)   | 11(1)  | 0(1)   |
| C(24) | 55(2)  | 39(2)  | 22(1) | 8(1)   | -4(1)  | -9(2)  |
| C(25) | 81(3)  | 44(2)  | 32(2) | 16(2)  | -9(2)  | -26(2) |
| C(26) | 81(3)  | 100(4) | 27(2) | 2(2)   | 13(2)  | -61(3) |
| C(27) | 66(2)  | 107(4) | 48(2) | -23(2) | 38(2)  | -44(2) |
| C(28) | 48(2)  | 66(2)  | 35(2) | -13(2) | 26(2)  | -15(2) |
| C(29) | 41(2)  | 40(2)  | 14(1) | 4(1)   | 9(1)   | -8(1)  |
| C(30) | 28(1)  | 24(1)  | 18(1) | 1(1)   | 8(1)   | 1(1)   |
| C(31) | 34(2)  | 34(2)  | 32(2) | 0(1)   | 14(1)  | 0(1)   |
| C(32) | 39(2)  | 39(2)  | 48(2) | -4(1)  | 24(2)  | -8(1)  |
| C(33) | 25(1)  | 47(2)  | 43(2) | -13(1) | 12(1)  | -4(1)  |
| C(34) | 30(2)  | 47(2)  | 31(2) | -1(1)  | 10(1)  | 3(1)   |
| C(35) | 28(1)  | 41(2)  | 29(1) | 2(1)   | 11(1)  | 0(1)   |
| C(36) | 27(1)  | 29(1)  | 24(1) | -4(1)  | 11(1)  | 1(1)   |
| C(37) | 24(1)  | 26(1)  | 21(1) | 3(1)   | 9(1)   | 4(1)   |
| C(38) | 34(1)  | 27(1)  | 21(1) | -1(1)  | 13(1)  | 7(1)   |
| C(39) | 59(2)  | 37(2)  | 60(2) | -1(2)  | -5(2)  | 18(2)  |
| C(40) | 124(4) | 45(2)  | 48(2) | 2(2)   | -26(2) | 33(3)  |
| C(41) | 171(5) | 34(2)  | 37(2) | 11(2)  | 34(3)  | 26(3)  |
| C(42) | 124(4) | 29(2)  | 84(3) | 10(2)  | 71(3)  | 12(2)  |

*Supplementary Information*

|       |       |       |       |        |        |        |
|-------|-------|-------|-------|--------|--------|--------|
| C(43) | 63(2) | 27(2) | 58(2) | 4(1)   | 31(2)  | 7(2)   |
| C(44) | 46(2) | 26(1) | 22(1) | -2(1)  | 13(1)  | 10(1)  |
| C(45) | 27(1) | 22(1) | 20(1) | 0(1)   | 9(1)   | 3(1)   |
| C(46) | 28(1) | 40(2) | 32(2) | 5(1)   | 8(1)   | 1(1)   |
| C(47) | 37(2) | 43(2) | 47(2) | 5(1)   | 14(1)  | -2(1)  |
| C(48) | 27(2) | 54(2) | 39(2) | -11(2) | 8(1)   | 0(1)   |
| C(49) | 31(2) | 61(2) | 24(1) | -1(1)  | 10(1)  | 10(1)  |
| C(50) | 29(1) | 45(2) | 20(1) | -1(1)  | 8(1)   | 7(1)   |
| C(51) | 27(1) | 30(1) | 21(1) | -2(1)  | 9(1)   | 6(1)   |
| C(52) | 27(1) | 27(1) | 19(1) | 0(1)   | 9(1)   | 3(1)   |
| C(53) | 30(1) | 34(2) | 19(1) | 3(1)   | 12(1)  | 4(1)   |
| C(54) | 35(2) | 38(2) | 22(1) | 11(1)  | 11(1)  | 4(1)   |
| C(55) | 46(2) | 37(2) | 27(1) | 10(1)  | 12(1)  | 2(1)   |
| C(56) | 50(2) | 45(2) | 33(2) | 8(1)   | 16(1)  | -11(2) |
| C(57) | 38(2) | 55(2) | 39(2) | 7(2)   | 21(1)  | -5(1)  |
| C(58) | 40(2) | 41(2) | 31(2) | 3(1)   | 20(1)  | 2(1)   |
| C(59) | 34(1) | 36(2) | 18(1) | 6(1)   | 12(1)  | 2(1)   |
| C(60) | 30(1) | 32(1) | 18(1) | -2(1)  | 12(1)  | 0(1)   |
| C(61) | 87(3) | 46(2) | 76(3) | -8(2)  | -11(2) | -4(2)  |
| C(62) | 74(3) | 48(2) | 53(2) | -10(2) | -2(2)  | 14(2)  |

---

*Supplementary Information*

**Table S10.** Hydrogen coordinates ( $\times 10^4$ ) and isotropic displacement parameters ( $\text{\AA}^2 \times 10^3$ ) for  $[\text{Ni}(\text{OP}^{\text{Ph}}_2\text{N}^{\text{Bz}})_2](\text{BF}_4)_2 \cdot (\text{CH}_3\text{CN})$  (**8**).

|        | x     | y     | z    | U(eq) |
|--------|-------|-------|------|-------|
| H(1A)  | 9250  | 1781  | 3966 | 39    |
| H(2A)  | 10208 | 2464  | 4289 | 47    |
| H(3A)  | 10827 | 2323  | 5257 | 47    |
| H(4A)  | 10485 | 1499  | 5912 | 44    |
| H(5A)  | 9532  | 764   | 5591 | 37    |
| H(7A)  | 8352  | 2679  | 4655 | 29    |
| H(7B)  | 8013  | 2298  | 3997 | 29    |
| H(8A)  | 7097  | 2830  | 4853 | 33    |
| H(8B)  | 7781  | 3126  | 5135 | 33    |
| H(9A)  | 6457  | 3885  | 3983 | 48    |
| H(10A) | 6300  | 5509  | 3364 | 58    |
| H(11A) | 7083  | 6680  | 3402 | 54    |
| H(12A) | 8022  | 6244  | 4060 | 53    |
| H(13A) | 8182  | 4644  | 4690 | 42    |
| H(15A) | 7076  | 2037  | 3637 | 29    |
| H(15B) | 6691  | 1828  | 4007 | 29    |
| H(16A) | 6351  | -2032 | 3846 | 38    |
| H(17A) | 5362  | -2572 | 3424 | 48    |
| H(18A) | 4674  | -1250 | 2812 | 47    |
| H(19A) | 4965  | 596   | 2612 | 46    |
| H(20A) | 5951  | 1140  | 3007 | 41    |
| H(22A) | 7344  | -1103 | 3206 | 29    |
| H(22B) | 7000  | 53    | 2873 | 29    |
| H(23A) | 7597  | 671   | 2512 | 31    |
| H(23B) | 8076  | -362  | 2751 | 31    |
| H(24A) | 7992  | 2773  | 2971 | 54    |
| H(25A) | 8724  | 4156  | 3052 | 75    |
| H(26A) | 9601  | 3514  | 3030 | 86    |
| H(27A) | 9751  | 1522  | 2915 | 82    |
| H(28A) | 9031  | 120   | 2839 | 56    |
| H(30A) | 8683  | -216  | 3753 | 28    |

*Supplementary Information*

|        |       |       |      |     |
|--------|-------|-------|------|-----|
| H(30B) | 8233  | -976  | 3923 | 28  |
| H(31A) | 9068  | 2302  | 6243 | 40  |
| H(32A) | 10050 | 2760  | 6776 | 48  |
| H(33A) | 10578 | 1735  | 7619 | 46  |
| H(34A) | 10137 | 236   | 7940 | 44  |
| H(35A) | 9152  | -252  | 7408 | 39  |
| H(37A) | 8636  | -1213 | 6186 | 28  |
| H(37B) | 8170  | -1440 | 6465 | 28  |
| H(38A) | 7681  | -2512 | 4973 | 32  |
| H(38B) | 8348  | -2116 | 5301 | 32  |
| H(39A) | 8978  | -3197 | 6129 | 73  |
| H(40A) | 9155  | -4846 | 6740 | 109 |
| H(41A) | 8391  | -6058 | 6707 | 100 |
| H(42A) | 7445  | -5666 | 6046 | 84  |
| H(43A) | 7266  | -4044 | 5428 | 57  |
| H(45A) | 7255  | -1829 | 5973 | 28  |
| H(45B) | 7005  | -2096 | 5298 | 28  |
| H(46A) | 6084  | -1897 | 5781 | 42  |
| H(47A) | 5138  | -2651 | 5348 | 52  |
| H(48A) | 4501  | -1925 | 4456 | 50  |
| H(49A) | 4799  | -419  | 4006 | 46  |
| H(50A) | 5748  | 338   | 4426 | 38  |
| H(52A) | 6917  | 1402  | 6119 | 29  |
| H(52B) | 6495  | 438   | 6218 | 29  |
| H(53A) | 7005  | 436   | 7227 | 32  |
| H(53B) | 7553  | -451  | 7471 | 32  |
| H(54A) | 7368  | -2524 | 6926 | 38  |
| H(55A) | 6726  | -4138 | 6660 | 45  |
| H(56A) | 5766  | -3921 | 6587 | 51  |
| H(57A) | 5446  | -2080 | 6780 | 51  |
| H(58A) | 6079  | -438  | 7015 | 42  |
| H(60A) | 8142  | 560   | 7214 | 31  |
| H(60B) | 7769  | 1628  | 6820 | 31  |
| H(61A) | 10531 | 4161  | 6167 | 125 |
| H(61B) | 10351 | 5510  | 5975 | 125 |

*Supplementary Information*

|        |       |      |      |     |
|--------|-------|------|------|-----|
| H(61C) | 10492 | 4618 | 5555 | 125 |
|--------|-------|------|------|-----|

---
